# Supplementary material
Source: PubMed Central journal article supplement (PMC3186106)
Supplement: 10194_2011_339_MOESM1_ESM.pdf [file 10194_2011_339_MOESM1_ESM.pdf]

**Botulinum toxin type-A in the prophylactic treatment of medication-overuse headache: a multicentre, double-blind, randomized, placebo-controlled, parallel-group study.**

**JOURNAL OF HEADACHE AND PAIN**

Giorgio Sandrini; Armando Perrotta\*; Cristina Tassorelli; Paola Torelli; Filippo Brighina; Grazia Sances; Giuseppe Nappi

\*Corresponding author

Armando Perrotta, MD, PhD

Headache Science Center, IRCCS "C. Mondino Institute of Neurology" Foundation

Via Mondino 2, 27100 Pavia, Italy

Tel.: +39 0382 380435 Fax: +39 0382 380448 E-mail: [armando.perrotta@mondino.it](mailto:armando.perrotta@mondino.it)

### Online Resource 1

Headache pain intensity and assessment of disability (MIDAS and HIT-6) in Medication-Overuse Headache patients at baseline and after Botulinum Toxin Type A (BoNTA) and placebo at 4 and 12 weeks.

|                             |                 | <b>BoNTA<br/>(n=27)</b> | <b>Placebo<br/>(n=29)</b> | <b>p values</b> |
|-----------------------------|-----------------|-------------------------|---------------------------|-----------------|
| <b>Pain intensity (NRS)</b> | <b>baseline</b> | 6.8±1.5 (3-10)          | 7.5±1.2 (5-10)            | .100            |
|                             | <b>4</b>        | 4.2±3.1 (3-9)           | 5.6±2.7 (0-9)             | .110            |
|                             | <b>12</b>       | 3.6±2.9 (0-8)           | 5.2±2.6 (0-9)             | .099            |
| <b>MIDAS</b>                | <b>baseline</b> | 39.0±19.3 (5-79)        | 52.5±27.7 (12-92)         | .142            |
|                             | <b>4</b>        | 23.3±16.5 (2-60)        | 40.4±29.0 (6-104)         | .070            |
|                             | <b>12</b>       | 18.0±13.8 (0-58)        | 33.8±25.5 (6-80)          | .064            |
| <b>HIT-6</b>                | <b>baseline</b> | 67.7±4.5 (59-74)        | 68.1±7.1 (52-78)          | .649            |
|                             | <b>4</b>        | 55.9±12.9 (36-76)       | 61.1±13.2 (36-78)         | .187            |
|                             | <b>12</b>       | 51.3±11.0 (38-70)       | 58.1±10.2 (36-76)         | .093            |

NRS= numerical rating scale; MIDAS= Migraine Disability Assessment Scale; HIT-6= Headache Impact Test
